# Supplementary material for: Biliary Neuroendocrine Neoplasms: Analysis of Prognostic Factors and Development and Validation of a Nomogram
Source: Frontiers journal article supplement (doi:10.3389/fonc.2021.654439), 2021-07-19
Supplement: Data_Sheet_2.PDF [file Data_Sheet_2.PDF]

Fig.1

☐ **Aged**

1. A person 65 through 79 years of age. For a person older than 79 years, **AGED**, 80 AND OVER is available.  
Year introduced: 1966

☐ **Middle Aged**

3. An adult **aged** 45 - 64 years.  
Year introduced: 2004(1966)

Fig.2

**2010 ENETS/WHO nomenclature and classification for neuroendocrine neoplasms arising in the gastrointestinal (GI) tract**

| Differentiation       | Grade                   | Mitotic count*     | Ki-67 index¶ | Traditional                                                                                | ENETS, WHO                               |
|-----------------------|-------------------------|--------------------|--------------|--------------------------------------------------------------------------------------------|------------------------------------------|
| Well differentiated   | Low grade (G1)          | <2 per 10 HPF      | <3%          | Carcinoid, islet cell, pancreatic (neuro)endocrine tumor                                   | Neuroendocrine tumor, G1                 |
|                       | Intermediate grade (G2) | 2 to 20 per 10 HPF | 3 to 20%     | Carcinoid, atypical carcinoid <sup>Δ</sup> , islet cell, pancreatic (neuro)endocrine tumor | Neuroendocrine tumor, G2                 |
| Poorly differentiated | High grade (G3)         | >20 per 10 HPF     | >20%         | Small cell carcinoma                                                                       | Neuroendocrine carcinoma, G3, small cell |
|                       |                         |                    |              | Large cell neuroendocrine carcinoma                                                        | Neuroendocrine carcinoma, G3, large cell |

ENETS: European Neuroendocrine Tumor Society; WHO: World Health Organization; HPF: high-power fields.

\* Counted in 10 HPF; 10 HPF = 2 mm<sup>2</sup>, at least 40 fields (at 400x magnification) evaluated in areas of highest mitotic density. Cut-offs per American Joint Commission on Cancer Staging Manual, 8th edition.

¶ Ki-67 index as assessed by MIB1 antibody staining: percent positive after count of 2000 cells in area of highest nuclear labeling. Cut-offs per American Joint Commission on Cancer Staging Manual, 8th edition.

Δ The term "atypical carcinoid" only applies to intermediate-grade neuroendocrine tumors of the lung.
